# Supplementary material
Source: PubMed Central journal article supplement (PMC5971482)
Supplement: JB.00159-18_zjb999094775s1.pdf [file JB.00159-18_zjb999094775s1.pdf]

1 **SUPPLEMENTAL DATA:**

2

3 **Association of  $\omega$  with the C-terminal region of  $\beta'$  subunit is essential for**  
4 **assembly of RNA polymerase in *Mycobacterium tuberculosis***

5

6 **Running title:** The essential role of  $\omega$  in *Mtb* RNAP assembly

7

8 Chunyou Mao<sup>1,2</sup>, Yan Zhu<sup>1,2</sup>, Pei Lu<sup>1</sup>, Lipeng Feng<sup>1,3</sup>, Shiyun Chen<sup>1,\*</sup>, Yangbo Hu<sup>1,\*</sup>

9

10 <sup>1</sup> *CAS Key Laboratory of Special Pathogens and Biosafety, Wuhan Institute of Virology, Chinese*  
11 *Academy of Sciences, Wuhan 430071, China.*

12 <sup>2</sup> *University of Chinese Academy of Sciences, Beijing 100049, China.*

13 <sup>3</sup> *Present address: Institute of Microbiology, Chinese Academy of Sciences, Beijing 100101,*  
14 *China*

15 \* *Correspondence: sychen@wh.iov.cn (S.C.) or ybhu@wh.iov.cn (Y.H.)*

16

## 17 **Supplementary Methods**

18

### 19 **Plasmid construction**

20 Plasmids and oligonucleotides used in this study are listed in Tables S1 and S2, respectively.  
21 PCR fragments were inserted into linearized vectors with a ClonExpress II One Step Cloning Kit  
22 (Vazyme, China). Mutations in genes were constructed with a QuikChange II XL Site-Directed  
23 Mutagenesis Kit (Stratagene). Details are described as below.

24 The pMtRc expressing *Mtb* RNAP core (with His-tag at the C-terminal of  $\beta'$  subunit) was  
25 constructed based on the pMR4 plasmid (1), in which a T7 promoter was inserted upstream of  
26 the *rpoC* gene. Primer pairs MtblpoB-BsrGI-F/MtblpoB-R and T7p-MtblpoC-F/  
27 MtblpoC-NotI-R were used to amplify two fragments covering the C-terminal of *rpoB* gene and  
28 the N-terminal of *rpoC* gene of *Mtb* from the pMR4 plasmid. These two fragments were fused  
29 into one fragment by overlap PCR, in which a T7 promoter was introduced upstream of the *rpoC*  
30 gene. This fragment was then inserted into the pMR4 plasmid between the BsrGI and NotI sites.  
31 The pMtRc $\Delta\omega$  plasmid expressing *Mtb* core $\Delta\omega$  was constructed based on pMtRc, in which the  
32 *rpoZ* gene was deleted using a Site-Directed Mutagenesis Kit. Mutation of  $\beta'$ CTD in *Mtb* core  
33 were introduced based on pMtRc as indicated in Table S1 using the Site-Directed Mutagenesis  
34 Kit.

35 Plasmids (pPaRc, pTtRc, pEcRc) expressing RNAP core enzymes (all with with His-tag at  
36 the C-terminal of  $\beta'$  subunit) from *Pae*, *Tth* and *Eco* were constructed in a similar way. Briefly,  
37 the *rpoA* and *rpoZ* genes from each bacterium were amplified and fused into one fragment  
38 named *rpoA-rpoZ* by overlap PCR, in which a ribosomal binding site (RBS) was introduced  
39 upstream of the *rpoZ* gene. The *rpoB* and *rpoC* genes from each strain were also amplified  
40 respectively. All these fragments were inserted into pET21a plasmid using the ClonExpress II  
41 One Step Cloning Kit to obtain pET21a-AZ, pET21a-B, and pET21a-C plasmids, respectively.  
42 Next, a fragment covering the T7 promoter and the *rpoC* gene from the pET21a-C plasmid was

43 amplified and inserted into the pET21a-AZ (downstream of the *rpoZ* gene) to obtain a plasmid  
44 named pET21a-AZC. Similarly, a fragment covering the T7 promoter and the *rpoB* gene from  
45 the pET21a-B plasmid was amplified and inserted into the pET21a-AZC (upstream of the *rpoC*  
46 gene) to obtain a plasmid named pET21a-AZBC, which was renamed as pEcRc, or pPaRc, or  
47 pTtRc depending on the source of the RNAP genes. Each of these plasmids carries a T7  
48 promoter (T7p), followed with an RBS and the *rpoA* gene, an RBS and the *rpoZ* gene, the  
49 second T7p, an RBS and the *rpoB* gene, the third T7p, an RBS and the *rpoC* gene, and a T7  
50 terminator. For plasmids expressing core enzymes lacking the  $\omega$  subunit, the *rpoZ* gene was  
51 omitted as described above.

52 Plasmids expressing RNAP core from *Msm* and *Sco* were constructed based on a  
53 two-plasmid system. A p15A ori plasmid with Kan resistance gene was used to express  $\alpha$ ,  $\omega$   
54 (wherever it is present) and  $\beta$  subunits, and pET21a was used to express  $\beta'$  subunit. All these  
55 clones were constructed as described above using the ClonExpress II One Step Cloning Kit.

56 Plasmids expressing  $\omega^{\text{Flag}}$  (without other tag) was constructed base on pET28a using the  
57 ClonExpress II One Step Cloning Kit. Plasmids expressing each of RNAP subunits ( $\alpha^{\text{His}}$ ,  $\beta$ ,  $\beta'$ ,  
58  $\omega^{\text{His}}$ ) used in RNAP *in vitro* reconstitution were constructed based on pET21a or pET28a  
59 respectively. Tag peptides (His-tag, His<sup>TEV</sup>-tag, or His-SUMO<sup>TEV</sup>-tag) were introduced into  
60 pET21a or pET28a using the QuikChange II XL Site-Directed Mutagenesis Kit or ClonExpress  
61 II One Step Cloning Kit, which were then used to express *Mtb*  $\sigma^A$ ,  $\sigma^B$  and RbpA respectively as  
62 shown in Table S1. The pET21a plasmid was used to express *Eco*  $\sigma^{70}$ . All these clones were  
63 constructed as described above using the ClonExpress II One Step Cloning Kit.

64

## 65 **Protein expression and purification**

66 *E. coli* BL21(DE3)  $\Delta rpoZ$  mutant was constructed by the CRISPR-Cas9 system as previously  
67 described (2). Briefly, the pTargetF plasmid (2) expressing the sgRNA targeting the *Eco rpoZ*  
68 gene sequence (GCGCTGCGCGAAATCGAAGA), and the donor DNA for homologous

69 recombination, were co-electroporated into electrocompetent *E. coli* cells harboring the pCas  
70 plasmid. Mutants were identified by colony PCR and confirmed by DNA sequencing.

71 Plasmids expressing the RNAP core, core $\Delta\omega$ , or other core mutants from *Mtb*, *Msm*, *Eco*, *S.*  
72 *coelicolor* (*Sco*), *P. aeruginosa* (*Pae*), or *T. thermophilus* (*Tth*), which all encode a C-terminal  
73 His-tag of  $\beta'$  subunit, were transformed into the *E. coli* BL21(DE3)  $\Delta rpoZ$  strain. Protein  
74 expression was induced by the addition of 0.3 mM isopropyl  $\beta$ -D-thiogalactopyranoside (IPTG)  
75 at an OD<sub>600</sub> of ~0.6, followed by another incubation at 20 °C for 15 h. Cells were harvested by  
76 centrifugation, re-suspended in buffer A (40 mM Tris-HCl pH 7.9, 500 mM NaCl, 5% glycerol)  
77 supplemented with 10 mM imidazole and 1 mM PMSF, and lysed by sonication. The lysate was  
78 centrifuged, and the supernatant was loaded onto a 5 mL Ni<sup>2+</sup>-affinity column (GE Healthcare)  
79 equilibrated in buffer A containing 10 mM imidazole. The column was then washed with 6  
80 column volume (CV) buffer A containing 30 mM imidazole and eluted with 4 CV buffer A  
81 containing 80 mM imidazole. Next, the elution was diluted and then loaded on a 5 mL heparin  
82 column (GE Healthcare) equilibrated with buffer B (20 mM Tris-HCl pH 7.9, 5% glycerol, 1  
83 mM EDTA, 1 mM 2-mercaptoethanol) plus 300 mM NaCl. The column was washed with 4 CV  
84 buffer B containing 300 mM NaCl and eluted with 3 CV buffer B containing 600 mM NaCl. The  
85 sample was further purified by anion-exchange chromatography (Mono Q 5/50 GL, GE  
86 Healthcare) using 15 CV buffer B with linear gradient of 300-500 mM NaCl. Finally, fractions  
87 containing RNAP was purified by size exclusion chromatography (Superdex 200, GE Healthcare)  
88 equilibrated in 20 mM Tris-HCl pH 7.9, 300 mM NaCl, 5% glycerol, 1 mM dithiothreitol.

89 To express  $\omega^{\text{Flag}}$  together with *Mtb* RNAP core $\Delta\omega$ , the pET28a-*MtbrpoZ*-Flag plasmid or its  
90 derivatives (pET28a-*MtbrpoZ*-E<sup>loop</sup>-Flag, pET28a-*MtbrpoZ*-T<sup>loop</sup>-Flag,  
91 pET28a-*MtbrpoZ*-M1-Flag, pET28a-*MtbrpoZ*-M2-Flag, pET28a-*MtbrpoZ*-M3-Flag,  
92 pET28a-*MtbrpoZ*-M4-Flag, pET28a-*MtbrpoZ*-M5-Flag. Information for these plasmid is listed  
93 in Table S1) were co-transformed with the pMtRc $\Delta\omega$  plasmid into the *E. coli* BL21(DE3)  $\Delta rpoZ$   
94 strain. Protein expression and purification were performed as described above.

95 *Mtb*  $\sigma^A$ ,  $\sigma^B$ , and RbpA were expressed from pET-His<sup>TEV</sup>- $\sigma^A$ , pET-sumo<sup>TEV</sup>- $\sigma^B$ , and  
96 pET-His<sup>TEV</sup>-RbpA in *E. coli* BL21(DE3) and purified by Ni<sup>2+</sup>-affinity column (GE Healthcare),  
97 followed by TEV protease cleavage (3) and size exclusion chromatography (Superdex 200, GE  
98 Healthcare). *Eco*  $\sigma^{70}$  was expressed from pET21a-*Eco* $\sigma^{70}$  and purified by Ni<sup>2+</sup>-affinity column  
99 (GE Healthcare) and size exclusion chromatography (Superdex 200, GE Healthcare).

100

101

102 **Supplementary figures and legends:**

103

104

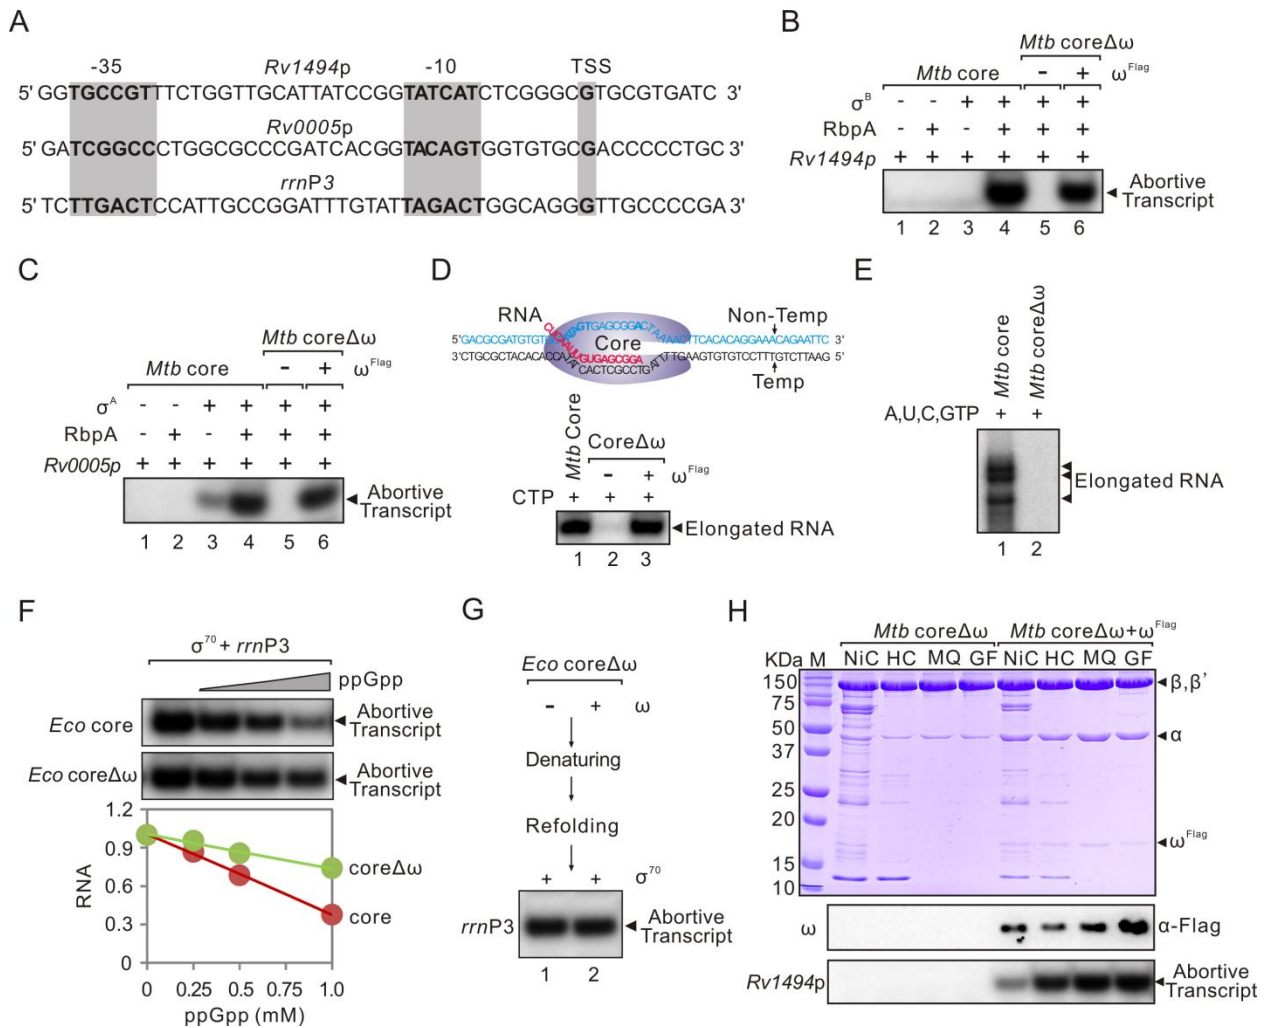

105

106 **Figure S1. Transcriptional activity of *Mtb* and *Eco* core and coreΔω.**

107 (A) Sequences of the promoters used in *in vitro* transcription assays. (B) *In vitro* abortive

108 transcription of *Mtb* core or coreΔω reconstituted with σ<sup>B</sup> at Rv1494p. RbpA protein was added

109 into reaction where indicated. (C) *In vitro* abortive transcription activity of *Mtb* core or coreΔω

110 at Rv0005p template. RbpA and σ<sup>A</sup> were added as indicated. (D) Transcriptional activities of *Mtb*

111 core and coreΔω in a σ-independent transcription assay. A scheme for this assay is shown at the

112 upper part. CTP was used as the substrate in these reactions. (E) Activities of *Mtb* core and

113 coreΔω in σ-independent transcription reactions using a mixture of ATP, UTP, CTP and GTP as

114 substrates. (F) *In vitro* abortive transcription of *Eco* core or coreΔω at rrnP3 promoter. The σ<sup>70</sup>

115 was added to reconstitute RNAP for promoter-dependent transcription. ppGpp was added at  
 116 concentrations of 0, 0.25, 0.5 and 1.0 mM. Quantifications of RNA products are shown at the  
 117 bottom. (G) *In vitro* abortive transcription of *in vitro* reconstituted *Eco* core in the presence or  
 118 absence of the  $\omega$  subunit at *rrnP3* promoter. (H) SDS-PAGE analysis of purified *Mtb* core and  
 119 core $\Delta\omega$  from the Ni-column (NiC), Heparin-column (HC), Mono Q (MQ), and Superdex 200  
 120 (GF) steps are shown in the top section. A western-blot for the Flag-tagged  $\omega$  subunit is shown in  
 121 the middle section. *In vitro* abortive initiation transcription of these RNAPs at *Rv1494p* are  
 122 shown in the bottom section. RbpA and  $\sigma^A$  were added in these reactions to reconstitute RNAP  
 123 for promoter-dependent transcription.

124

125

126

127

128

129

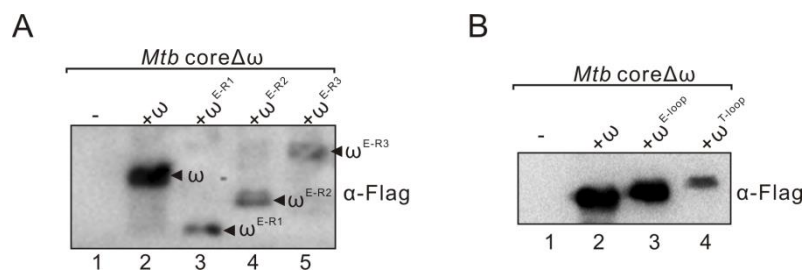

130

131 **Figure S2. Soluble expression of mutated  $\omega$  subunit in RNAP expression system.**

132 The lysate supernatants of *Mtb* core $\Delta\omega$  co-expressed with mutated  $\omega$  subunit (A:  $\omega^{E-R1}$ ,  $\omega^{E-R2}$  and  
 133  $\omega^{E-R3}$ ; B:  $\omega^{E-loop}$  and  $\omega^{T-loop}$ ) were analyzed by western blotting via anti-Flag antibody to confirm  
 134 the soluble expression of these  $\omega$  derivatives.

135

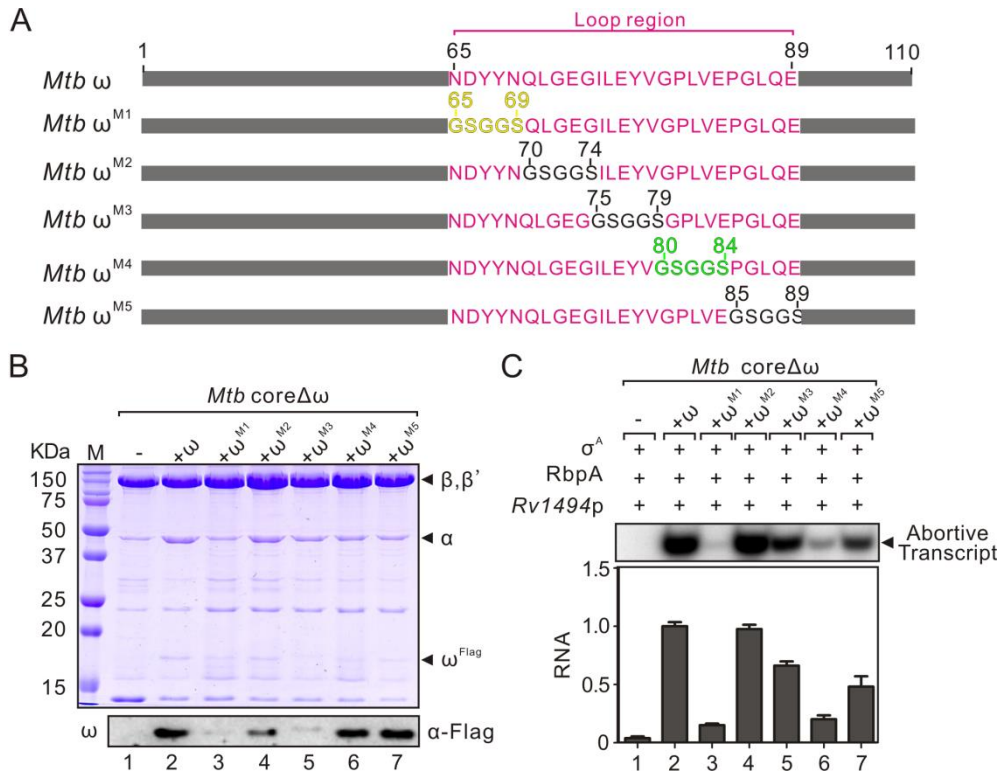

137

138 **Figure S3. The loop region of  $\omega$  is important for *Mtb* core.**

139 (A) Mutations of *Mtb*  $\omega$  loop regions by GSGGS linker replacement. (B) SDS-PAGE analysis of  
 140 purified *Mtb* core $\Delta\omega$  co-expressed with the loop-mutated  $\omega$  subunit is shown at the upper part.

141 Western-blot for  $\omega^{\text{Flag}}$  is shown in the bottom section. (C) *In vitro* abortive transcription of  
 142 purified *Mtb* core $\Delta\omega$  derivatives at *Rv1494p*. RbpA and  $\sigma^A$  were added in each reaction in this  
 143 promoter-dependent transcription assay. Quantifications of transcripts from three independent  
 144 tests are shown in the bottom section.

145

146



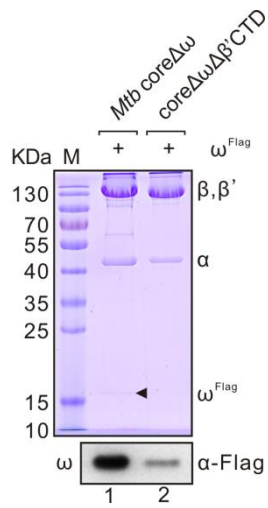

147  
 148 **Figure S4. Purified *Mtb* coreΔω and coreΔωΔβ'CTD co-expressed with Flag-tagged ω**  
 149 **subunit.**

150 SDS-PAGE of purified *Mtb* coreΔω and coreΔωΔβ'CTD is shown in the upper panel and  
 151 western blot analysis of ω<sup>Flag</sup> subunit using a Flag-tag antibody is shown at the bottom panel.

152  
 153  
 154  
 155  
 156

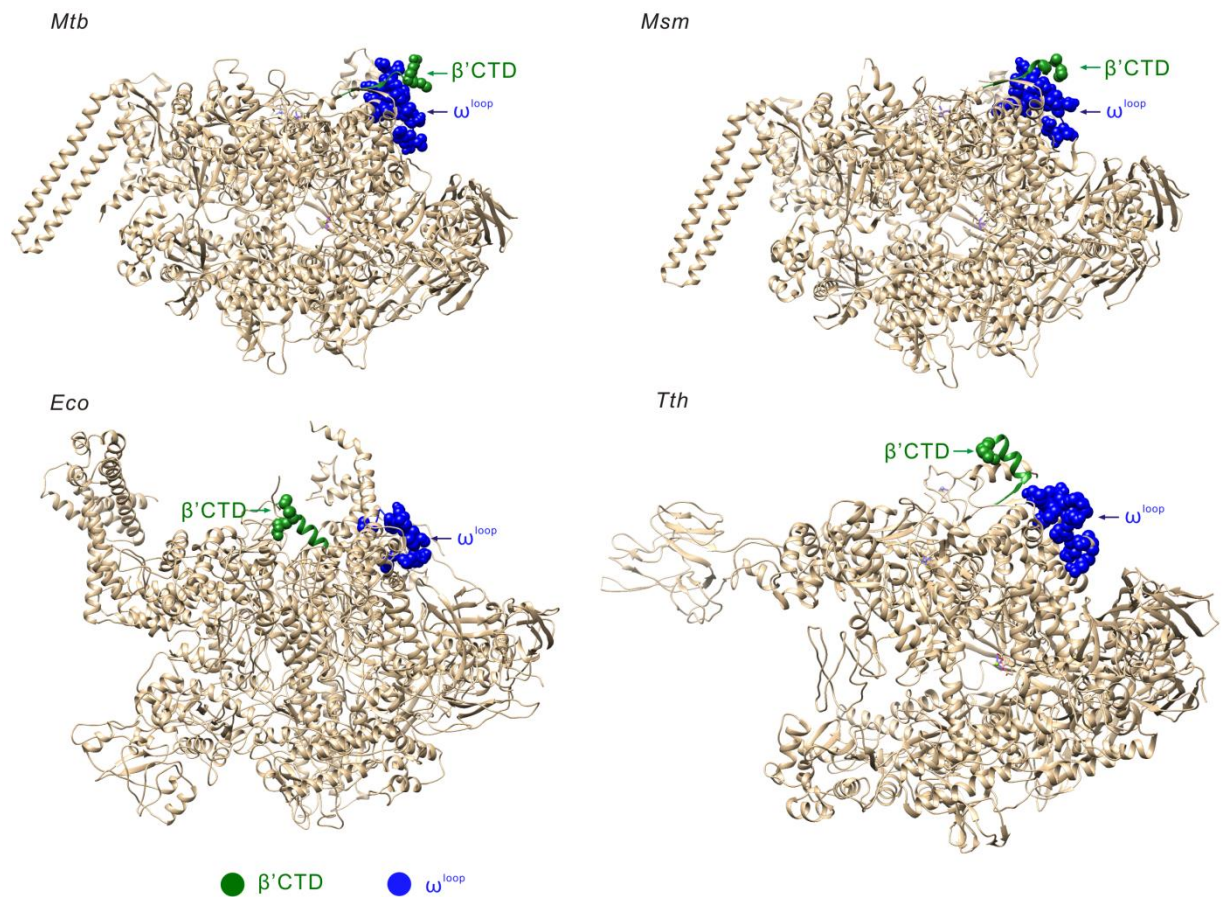

157

●  $\beta'$ CTD    ●  $\omega$  loop

158 **Figure S5. Locations of  $\beta'$ CTD and  $\omega$  loop regions on bacterial RNAP structures.**

159 Structures of RNAP from *Mtb* (PDB: 5UH8), *Msm* (PDB: 5TW1), *Eco* (PDB: 4YG2) and *Tth*  
 160 (PDB: 1IW7) are shown. The  $\omega$  loop in structure is indicated in blue and the  $\beta'$ CTD region is  
 161 indicated in green.

162

163

164 **Supplementary tables:**

165

166 **Table S1. Genomic DNA and plasmids used in this study**

| Name                                    | Description*                                                                                                                                                                                  | Resource         |
|-----------------------------------------|-----------------------------------------------------------------------------------------------------------------------------------------------------------------------------------------------|------------------|
| <b>Genomic DNA</b>                      |                                                                                                                                                                                               |                  |
| <i>M. tuberculosis</i> H37Rv            |                                                                                                                                                                                               | BEI Resources    |
| <i>M. smegmatis</i> mc <sup>2</sup> 155 |                                                                                                                                                                                               | Dr. Jiaoyu Deng  |
| <i>S. coelicolor</i> M145               |                                                                                                                                                                                               | Dr. Gang Liu     |
| <i>E. coli</i> K12 MG1655               |                                                                                                                                                                                               | Dr. Qingsheng Qi |
| <i>P. aeruginosa</i> PAO1               |                                                                                                                                                                                               | Dr. Dongru Qiu   |
| <i>T. thermophiles</i> HB8              |                                                                                                                                                                                               | Dr. Yu Zhang     |
| <b>Plasmids</b>                         |                                                                                                                                                                                               |                  |
| pET28a                                  | Protein expression plasmid, T7 promoter, Kan <sup>R</sup>                                                                                                                                     | Lab collection   |
| pET21a                                  | Protein expression plasmid, T7 promoter, Amp <sup>R</sup>                                                                                                                                     | Lab collection   |
| pMtRc                                   | Plasmid expressing all subunits of <i>Mtb</i> RNA polymerase core enzyme, with His-tag at the C-terminal of $\beta'$ subunit, Amp <sup>R</sup>                                                | This study       |
| pMtRc $\Delta\omega$                    | Plasmid expressing the $\alpha$ , $\beta$ , and $\beta'$ subunits of <i>Mtb</i> RNA polymerase, with His-tag at the C-terminal of $\beta'$ subunit, Amp <sup>R</sup>                          | This study       |
| pMtRc $\Delta\beta'$ CTD                | Based on pMtRc, with a deletion of <i>Mtb</i> $\beta'$ CTD (1271-1316 aa), Amp <sup>R</sup>                                                                                                   | This study       |
| pMtRc $\Delta\omega\Delta\beta'$ CTD    | Based on pMtRc $\Delta\omega$ , with a deletion of <i>Mtb</i> $\beta'$ CTD (1271-1316 aa), Amp <sup>R</sup>                                                                                   | This study       |
| pET28a- <i>MtbrpoA</i>                  | pET28a expressing the $\alpha$ subunits of <i>Mtb</i> RNA polymerase with N-terminal His-tag, Kan <sup>R</sup>                                                                                | This study       |
| pET21a- <i>MtbrpoB</i>                  | Plasmid expressing the $\beta$ subunits of <i>Mtb</i> RNA polymerase, without tag, Amp <sup>R</sup>                                                                                           | This study       |
| pET21a- <i>MtbrpoC</i>                  | pET21a expressing the $\beta'$ subunits of <i>Mtb</i> RNA polymerase, without tag, Amp <sup>R</sup>                                                                                           | This study       |
| pET21a- <i>MtbrpoZ</i>                  | pET21a expressing the $\omega$ subunits of <i>Mtb</i> RNA polymerase with C-terminal His-tag, Amp <sup>R</sup>                                                                                | This study       |
| pET28a-His <sup>TEV</sup> - $\sigma^A$  | pET28a expressing <i>Mtb</i> $\sigma^A$ (with deletion of 1-165aa), with N-terminal His <sup>TEV</sup> -tag, Kan <sup>R</sup>                                                                 | This study       |
| pET28a-sumo <sup>TEV</sup> - $\sigma^B$ | pET28a expressing <i>Mtb</i> $\sigma^B$ protein with N-terminal sumo <sup>TEV</sup> -tag, Kan <sup>R</sup>                                                                                    | This study       |
| pET28a-His <sup>TEV</sup> -RbpA         | pET28a expressing <i>Mtb</i> RbpA with N-terminal His <sup>TEV</sup> -tag, Kan <sup>R</sup>                                                                                                   | This study       |
| pET28a- <i>MtbrpoZ</i> -Flag            | pET28a expressing <i>Mtb</i> $\omega$ subunit with C-terminal Flag-tag (without His-tag), Kan <sup>R</sup>                                                                                    | This study       |
| pET28a- <i>MtbrpoZ</i> -EcR1-Flag       | pET28a expressing <i>Mtb</i> $\omega^{EcR1}$ (deletion of <i>Mtb</i> $\omega$ 1-35 aa) subunit with C-terminal Flag-tag (without His-tag), Kan <sup>R</sup>                                   | This study       |
| pET28a- <i>MtbrpoZ</i> -EcR2-Flag       | pET28a expressing <i>Mtb</i> $\omega^{EcR2}$ ( <i>Mtb</i> $\omega$ 36-103 aa was replaced by <i>Ec</i> $\omega$ 2-58 aa) subunit with C-terminal Flag-tag (without His-tag), Kan <sup>R</sup> | This study       |
| pET28a- <i>MtbrpoZ</i> -                | pET28a expressing <i>Mtb</i> $\omega^{EcR3}$ ( <i>Mtb</i> $\omega$ 104-110 aa was                                                                                                             | This study       |

|                                                 |                                                                                                                                                                                                                                             |            |
|-------------------------------------------------|---------------------------------------------------------------------------------------------------------------------------------------------------------------------------------------------------------------------------------------------|------------|
| EcR3-Flag                                       | replaced by <i>Ec</i> $\omega$ 59-91 aa subunit with C-terminal Flag-tag (without His-tag), Kan <sup>R</sup>                                                                                                                                |            |
| pET28a- <i>MtbrpoZ</i> -E <sup>loop</sup> -Flag | pET28a expressing $\omega$ subunit carrying the loop region from <i>E. coli</i> $\omega$ ( <i>Mtb</i> $\omega$ 65-89 aa was replaced by <i>Ec</i> $\omega$ 31-44 aa), with C-terminal Flag-tag (without His-tag), Kan <sup>R</sup>          | This study |
| pET28a- <i>MtbrpoZ</i> -T <sup>loop</sup> -Flag | pET28a expressing $\omega$ subunit carrying the loop region from <i>T. thermophiles</i> $\omega$ ( <i>Mtb</i> $\omega$ 65-89 aa was replaced by <i>Tth</i> $\omega$ 31-58 aa), with C-terminal Flag-tag (without His-tag), Kan <sup>R</sup> | This study |
| pET28a- <i>MtbrpoZ</i> -M1-Flag                 | pET28a expressing <i>Mtb</i> $\omega$ <sup>M1</sup> ( <i>Mtb</i> $\omega$ 65-69 aa was replaced by GSGGS linker) subunit with C-terminal Flag tag and without His tag, Kan <sup>R</sup>                                                     | This study |
| pET28a- <i>MtbrpoZ</i> -M2-Flag                 | pET28a expressing <i>Mtb</i> $\omega$ <sup>M2</sup> ( <i>Mtb</i> $\omega$ 70-74 aa was replaced by GSGGS linker) subunit with C-terminal Flag-tag (without His-tag), Kan <sup>R</sup>                                                       | This study |
| pET28a- <i>MtbrpoZ</i> -M3-Flag                 | pET28a expressing <i>Mtb</i> $\omega$ <sup>M3</sup> ( <i>Mtb</i> $\omega$ 75-79 aa was replaced by GSGGS linker) subunit with C-terminal Flag-tag (without His-tag), Kan <sup>R</sup>                                                       | This study |
| pET28a- <i>MtbrpoZ</i> -M4-Flag                 | pET28a expressing <i>Mtb</i> $\omega$ <sup>M4</sup> ( <i>Mtb</i> $\omega$ 80-84 aa was replaced by GSGGS linker) subunit with with C-terminal Flag-tag (without His-tag), Kan <sup>R</sup>                                                  | This study |
| pET28a- <i>MtbrpoZ</i> -M5-Flag                 | pET28a expressing <i>Mtb</i> $\omega$ <sup>M5</sup> ( <i>Mtb</i> $\omega$ 85-89 aa was replaced by GSGGS linker) subunit with C-terminal Flag-tag (without His-tag), Kan <sup>R</sup>                                                       | This study |
| pEcRc                                           | Plasmid expressing all subunits of <i>E. coli</i> RNA polymerase core enzyme, with His-tag at the C-terminal of $\beta'$ subunit, Amp <sup>R</sup>                                                                                          | This study |
| pEcRc $\Delta\omega$                            | Plasmid expressing the $\alpha$ , $\beta$ , and $\beta'$ subunits of <i>E. coli</i> RNA polymerase, with His-tag at the C-terminal of $\beta'$ subunit, Amp <sup>R</sup>                                                                    | This study |
| pET21a- <i>EcrpoA</i>                           | pET21a expressing the $\alpha$ subunits of <i>E. coli</i> RNA polymerase with C-terminal His-tag, Amp <sup>R</sup>                                                                                                                          | This study |
| pET21a- <i>EcrpoB</i>                           | pET21a expressing the $\beta$ subunits of <i>E. coli</i> RNA polymerase, without His-tag, Amp <sup>R</sup>                                                                                                                                  | This study |
| pET21a- <i>EcrpoC</i>                           | pET21a expressing the $\beta'$ subunits of <i>E. coli</i> RNA polymerase, without His-tag, Amp <sup>R</sup>                                                                                                                                 | This study |
| pET21a- <i>EcrpoZ</i>                           | pET21a expressing the $\omega$ subunits of <i>E. coli</i> RNA polymerase with C-terminal His-tag, Amp <sup>R</sup>                                                                                                                          | This study |
| pET21a- <i>Ecc</i> <sup>70</sup>                | pET21a expressing the $\sigma$ <sup>70</sup> subunit of <i>E. coli</i> , with C-terminal His-tag, Amp <sup>R</sup>                                                                                                                          | This study |
| pET21a- <i>MsrpoA</i> B                         | pET21a expressing the $\alpha$ and $\beta$ subunits of <i>Ms</i> RNA polymerase, without His-tag, Amp <sup>R</sup>                                                                                                                          | This study |
| pET21a- <i>MsrpoA</i> BZ                        | pET21a expressing the $\alpha$ , $\beta$ , and $\omega$ subunits of <i>Ms</i> RNA polymerase, without His-tag, Amp <sup>R</sup>                                                                                                             | This study |
| pET21a- <i>MsrpoA</i> BZ-Flag                   | pET21a expressing the $\alpha$ , $\beta$ , and $\omega$ (with C-terminal Flag-tag) subunits of <i>Ms</i> RNA polymerase, Amp <sup>R</sup>                                                                                                   | This study |
| pET28a- <i>MsrpoC</i>                           | pET28a expressing the $\beta'$ subunits of <i>Ms</i> RNA polymerase, with C-terminal His-tag kan <sup>R</sup>                                                                                                                               | This study |
| pPaRc                                           | Plasmid expressing all subunits of <i>P. aeruginosa</i> RNA                                                                                                                                                                                 | This study |

|                              |                                                                                                                                                                                |            |
|------------------------------|--------------------------------------------------------------------------------------------------------------------------------------------------------------------------------|------------|
|                              | polymerase core enzyme, with His-tag at the C-terminal of $\beta'$ subunit, Amp <sup>R</sup>                                                                                   |            |
| pPaRc $\Delta\omega$         | Plasmid expressing the $\alpha$ , $\beta$ , and $\beta'$ subunits of <i>P. aeruginosa</i> RNA polymerase, with His-tag at the C-terminal of $\beta'$ subunit, Amp <sup>R</sup> | This study |
| pTthRc                       | Plasmid expressing all subunits of <i>T. thermophilus</i> RNA polymerase core enzyme, with His-tag at the C-terminal of $\beta'$ subunit, Amp <sup>R</sup>                     | This study |
| pTthRc $\Delta\omega$        | Plasmid expressing the $\alpha$ , $\beta$ , and $\beta'$ subunits of <i>T. thermophilus</i> RNA polymerase, with His-tag at C-terminal of $\beta'$ subunit, Amp <sup>R</sup>   | This study |
| pET28a- <i>Tth</i> rpoZ-Flag | pET28a expressing <i>Tth</i> $\omega$ subunit with C-terminal Flag-tag, without His-tag, Kan <sup>R</sup>                                                                      | This study |
| pET28a- <i>Ecr</i> rpoZ-Flag | pET28a expressing <i>Eco</i> $\omega$ subunit with C-terminal Flag-tag, without His-tag, Kan <sup>R</sup>                                                                      | This study |
| pET21a- <i>Sco</i> AZB       | pET21a expressing the $\alpha$ , $\omega$ and $\beta$ subunits of <i>S. coelicolor</i> RNA polymerase, without His-tag, Amp <sup>R</sup>                                       | This study |
| pET21a- <i>Sco</i> AB        | pET21a expressing the $\alpha$ and $\beta$ subunits of <i>S. coelicolor</i> RNA polymerase, without His-tag, Amp <sup>R</sup>                                                  | This study |
| pKT-T7- <i>Sco</i> C         | Plasmid expressing the $\beta'$ subunit of <i>S. coelicolor</i> RNA polymerase, with C-terminal His-tag, Kan <sup>R</sup>                                                      | This study |
| pRK793                       | Plasmid expressing TEV protease enzyme, Amp <sup>R</sup>                                                                                                                       | (3)        |
| pCas                         | Plasmid expressing the Cas9 and $\lambda$ Red recombination system in <i>E. coli</i> , Kan <sup>R</sup>                                                                        | (2)        |
| pTargetF                     | Plasmid transcribing sgRNA in <i>E. coli</i> , Str <sup>R</sup>                                                                                                                | (2)        |
| pTarget- <i>Ecr</i> rpoZ     | Plasmid transcribing sgRNA targeting to <i>Ec rpoZ</i> , Str <sup>R</sup>                                                                                                      | This study |

167 \* Amp<sup>R</sup>, Kan<sup>R</sup>, and Str<sup>R</sup> represent resistance to ampicillin, kanamycin and streptomycin,  
168 respectively.

169

170 **Table S2. Oligonucleotides used in this study.**

| Name                     | Sequence (5'→3')                                               | Application                                                      |
|--------------------------|----------------------------------------------------------------|------------------------------------------------------------------|
| MtbrpoB-BsrGI-F          | TACCCGGTCACGGTTGGCTACATG                                       | pMtRc                                                            |
| MtbrpoB-R                | GATCGAGAGAGAATTACGCAAGATCCTCGA<br>CA                           |                                                                  |
| T7p-MtbrpoC-F            | GTAATTCTCTCTCGATCCCGCGAAATTAATA<br>CGA                         |                                                                  |
| MtbrpoC-NotI-R           | GTCTCGGCCATCCACGCATCGC                                         | pMtRc $\Delta\omega$                                             |
| MtRc-drpoZ-F             | GAACAGCTTTAGCACGCCGATCTGCTCGAG<br>CACACCGAGGGCGAGT             |                                                                  |
| MtRc-drpoZ-R             | GATCGGCGTGCTAAAGCTGTTCGGTTTCGG<br>CGTAGTCCTGCTCG               |                                                                  |
| $\Delta\beta'$ CTD-F     | TCAACCGCTACCGCAACATCCACCACCACC<br>ACCACCACTGAGATGGCCGC         | pMtRc $\Delta\beta'$ CTD<br>pMtRc $\Delta\omega\Delta\beta'$ CTD |
| $\Delta\beta'$ CTD-R     | TCAGTGGTGGTGGTGGTGGTGGATGTTGCG<br>GTAGCGGTTGATACCGGTACC        |                                                                  |
| pET28a-R2                | CATCACCAGGCCGCTGCTGTG                                          | pET28a-sumo <sup>TEV</sup>                                       |
| pET28a-F2                | GAGAACCTGTACTTCCAATCC                                          |                                                                  |
| SUMO-F                   | CAGCGGCCTGGTGATGTCGGACTCAGAAGT<br>C                            |                                                                  |
| SUMO-R                   | GGAAGTACAGGTTCTCTCCACCAATCTGTT<br>CTCTGTG                      |                                                                  |
| pET28a-TEV-F             | GCGCGGCAGCGAGAACCTGTACTTCCAATC<br>CCATATGGCTAGCATGACTGGTGGGA   | pET28a-His <sup>TEV</sup>                                        |
| pET28a-TEV-R             | CTAGCCATATGGGATTGGAAGTACAGGTTC<br>TCGCTGCCGCGCGGCACCAGGCC      |                                                                  |
| pET-F                    | TAACAAAGCCCGAAAGGAAGCTGA                                       | pET backbone                                                     |
| TEV-R                    | CATGGATTGGAAGTACAGGTTCTC                                       |                                                                  |
| pET-R                    | CATGGTATATCTCCTTCTTAAAGTTAAAC                                  |                                                                  |
| pET21a-F                 | TAAGCGGCCGCACTCGAGCACCACCACC                                   |                                                                  |
| pET21a-R                 | CATATGTATATCTCCTTCTTAAAGTTAAAC                                 |                                                                  |
| MtbrpoA-F                | ACCTGTA CT TCCAATCCATGCTGATCTCAC<br>AGCGCCCCACCCTG             | pET28a- <i>MtbrpoA</i>                                           |
| MtbrpoA- R               | CTTCCTTTCGGGCTTTGTTAAAGCTGTTCGG<br>TTTCGGCGTAGTCCTG            |                                                                  |
| MtbrpoB-21a-F            | TAAGAAGGAGATATACATATGGTGTTGGC<br>AGATTCCCGCCAGAG               | pET21a- <i>MtbrpoB</i>                                           |
| MtbrpoB-21a-R            | CTTCCTTTCGGGCTTTGTTACGCAAGATCCT<br>CGACACTTGCCG                |                                                                  |
| MtbrpoC-21a-F            | TAAGAAGGAGATATACATATGCTCGACGTC<br>AACTTCTTCGATG                | pET21a- <i>MtbrpoC</i>                                           |
| MtbrpoC-21a-R            | CTTCCTTTCGGGCTTTGTTAGCGGTAGTCGC<br>TGTAGCCGTAGTC               |                                                                  |
| <i>MtbrpoZ</i> -F        | AAGAAGGAGATATACATATGAGTATCTCGC<br>AGTCCG                       | pET21a- <i>MtbrpoZ</i>                                           |
| <i>MtbrpoZ</i> His-R     | CTTCCTTTCGGGCTTTGTTAGTGGTGGTGGT<br>GGTGGTGCTCGCCCTCGGTGTGCTCGA |                                                                  |
| TEV-SigA- $\Delta$ 165-F | ACCTGTA CT TCCAATCCATGGAAGACCACG<br>AAGACCTCGAAGC              | pET28a-His <sup>TEV</sup> -Sig<br>A $\Delta$ 165                 |

|                           |                                                                     |                                                                             |
|---------------------------|---------------------------------------------------------------------|-----------------------------------------------------------------------------|
| Tev-SigA-Δ165-R           | TCCTTTCGGGCTTTGTTAGTCCAGGTAGTC<br>GCGCAGGAC                         | pET28a-sumo <sup>TEV</sup> -S<br>igB<br>pET28a-His <sup>TEV</sup> -Rb<br>pA |
| TEV-SigB-F                | ACCTGTACTIONCCAATCCATGGCCGATGCAC<br>CCACAAG                         |                                                                             |
| Tev-SigB-R                | TCCTTTCGGGCTTTGTTAGCTGGCGTACGA<br>CCGCAG                            |                                                                             |
| TEV-RbpA-F                | ACCTGTACTIONCCAATCCATGGCTGATCGTG<br>TCCTGAGG                        |                                                                             |
| TEV-RbpA-R                | TCCTTTCGGGCTTTGTTAGCCGCGCCGACG<br>TGACCGAATGAG                      |                                                                             |
| <i>MtbrpoZ</i> -F         | AAGAAGGAGATATACATATGAGTATCTCGC<br>AGTCCG                            | pET28a- <i>MtbrpoZ</i>                                                      |
| <i>MtbrpoZ</i> -R         | CTTCCTTTCGGGCTTTGTTACTCGCCCTCGG<br>TGTGCTCGA                        |                                                                             |
| <i>MtbrpoZ</i> flag-F     | CGAGGGCGAGGACTACAAAGACGATGACG<br>ACAAGTAACAAAGCCCGAAAGGAAGCTGA<br>G | pET28a- <i>MtbrpoZ</i> -F<br>lag                                            |
| <i>MtbrpoZ</i> flag-R     | GGCTTTGTTACTTGTGTCATCGTCTTTGTA<br>GTCCTCGCCCTCGGTGTGCTCGAGCAGA      |                                                                             |
| <i>MtbrpoZ</i> -TEV-Y67-F | CAACGACTACGAGAACCTGTACTIONCCAATC<br>CTACAACCAGCTTGGCGAGGGCCTCCTCG   | pET28a- <i>MtbrpoZ</i> <sup>TE</sup><br>V-Flag                              |
| <i>MtbrpoZ</i> -TEV-Y67-R | GCTGGTTGTAGGATTGGAAGTACAGGTTCT<br>CGTAGTCGTTGATCTGCCGGGCACGCTTT     |                                                                             |
| <i>MtbrpoZ</i> -d35-F     | AAGAAGGAGATATACCATGCTGAATCCGCC<br>CATCGACGAGTTGCTG                  | pET28a- <i>MtbrpoZ</i> -<br>EcR1-Flag                                       |
| V-EcR2-F                  | CTCGAGCACACCGAGGGCGAG                                               | pET28a- <i>MtbrpoZ</i> -<br>EcR2-Flag                                       |
| V-EcR2-R                  | GATGCCAGCGGGGTGTGCTAG                                               |                                                                             |
| EcR2-F                    | ACGACACCCCGCTGGGCATCGCACGCGTAA<br>CTGTTCAAGACGCTG                   |                                                                             |
| EcR2-R                    | TCGCCCTCGGTGTGCTCGAGCAGACCTTCT<br>TCGATTCGCGCAGC                    |                                                                             |
| <i>MtbrpoZ</i> -103-R     | CTGGTTGTTGATCAGATCGGCGTGGATCTCG<br>CGC                              | pET28a- <i>MtbrpoZ</i> -<br>EcR3-Flag                                       |
| <i>EcrpoZ</i> -C-F        | GATCTGATCAACAACCAGATCCTCGACG                                        |                                                                             |
| <i>EcrpoZ</i> -28a-R      | CTTCCTTTCGGGCTTTGTTAACGACGACCTT<br>CAGCAATAG                        |                                                                             |
| V-Eloop-F                 | AAGAAGGAGATATACATATGAGTATCTCGCA<br>GTCCGACG                         | pET28a- <i>MtbrpoZ</i> -<br>E <sup>loop</sup> -Flag                         |
| V-Eloop-R                 | CGGTACCAGCGGATCCTTTCCGCCTACCTG<br>GATCTGCCGGGCACGCTTTGCCGCATAG      |                                                                             |
| Eloop-F                   | GAAAGGATCCGCTGGTACCGGAAGAAAAC<br>GATAAGCCGTTGTCCATCGCGTTGCGCGAG     |                                                                             |
| Eloop-R                   | CTTCCTTTCGGGCTTTGTTACTTGTGTCAT<br>CGTCTTTGTAG                       |                                                                             |
| V-Tloop-F                 | AAGCCGTTGTCCATCGCGTTGCGCGAGATC                                      |                                                                             |
| V-Tloop-R                 | GATCTGCCGGGCACGCTTTGCCGCATAG                                        |                                                                             |
| Tloop-F                   | AAAGCGTGCCCGGCAGATCCTCCGCCACGG<br>CTTCAAGAAC                        |                                                                             |
| Tloop-R                   | AACGCGATGGACAACGGCTTGGGATCGTCA<br>AAAAGCCCCTC                       |                                                                             |

|             |                                                                   |                               |
|-------------|-------------------------------------------------------------------|-------------------------------|
| AZ-RC-F     | GTTGGCTGCTGCCACCGCTG                                              | pPaRc and pTthRc backbone     |
| AZ-RC-R     | TCAGCTTCCTTTTCGGGCTTT                                             |                               |
| B-RC-F      | AAGCCCGAAAGGAAGCTGAGATCTTCCCCA<br>TCGGTGATG                       |                               |
| B-RC-R      | TTTCATAGCTGTCTCCTTCTCAGCTTCCTTTC<br>GGGCTTT                       |                               |
| PArpoA-F    | TAAGAAGGAGATATACATATGCAGAGTTCG<br>GTAAATGAGTT                     | pPaRc                         |
| PArpoA-R    | CTATATCTCCTTCTTGGATCTCAGGCAGTGG<br>CCTTGTCGTC                     |                               |
| PArpoZ-F    | GATCCAAGAAGGAGATATAGATATGGCCCG<br>CGTCACCGTTGAAG                  |                               |
| PArpoZ-R    | CTTCCTTTCGGGCTTTGTTACAGGGCCTCGG<br>TGTTGGC                        |                               |
| PArpoB-F    | TAAGAAGGAGATATACATATGGCTTACTCAT<br>ACACTGAGA                      |                               |
| PArpoB-R    | CTTCCTTTCGGGCTTTGTTATTCGGTTTCCA<br>GTTTCGATGTC                    |                               |
| PArpoC-F    | TGCTAACTCCGACGGGAGCAAATCCATGAA<br>AGACTTGCTTAATCTGTTGA            |                               |
| PArpoC-R    | CTTCCTTTCGGGCTTTGTTAGTGGTGGTGGT<br>GGTGGTGGTTACCGCTCGAGTTCAGCG    |                               |
| PArpoC-RC-F | AGAAGGAGACAGCTATGAAAGAC                                           |                               |
| pPaRC-dZ-F  | CACTGCCTGACGACGACGAGGCCAACACC<br>GAGGCCCTGTAAC                    |                               |
| pPaRC-dZ-R  | CTCGTCGTCGTCAGGCAGTGGCCTTGTCGT<br>CTTTCTTAAG                      |                               |
| TtrpoA-F    | TAAGAAGGAGATATACATATGTTGGATTCCA<br>AGCTCAAGGCC                    | pTthRc                        |
| TtrpoA-R    | ATCTCCTTCTTAAGTCTGCTTACTCCTTCAG<br>GGTGAAGCCCTTC                  |                               |
| TtrpoZ-F    | CAGACTTAAGAAGGAGATATAGATATGGCG<br>GAACCGGGCATTGACAAGC             |                               |
| TtrpoZ-R    | CTTCCTTTCGGGCTTTGTTACTCCTCCCGCT<br>CCACCGGGTAG                    |                               |
| TtrpoB-F    | TAAGAAGGAGATATACATATGGAGATCAAG<br>CGGTTCGGTCCG                    |                               |
| TtrpoB-R    | CTTCCTTTCGGGCTTTGTTACCGCTTGGAGG<br>CCAACCCCTCA                    |                               |
| TtrpoC-F    | AAAGCCCGAAAGGAAGCTGAAGAAGGAGA<br>CAGCTATGAAAAAAGAGGTTTCGTAAGGTTTC |                               |
| TtrpoC-R    | CAGCGGTGGCAGCAGCCAACCTAGTGGTGG<br>TGGTGGTGGTGGAGCCTGCTTGCCGGGCTG  |                               |
| TtrpoC-RC-F | AGAAGGAGACAGCTATGAAAAAAGAG                                        |                               |
| TtrpoA-R2   | CTTCCTTTCGGGCTTTGTTACTCCTTCAGGG<br>TGAAGCCCTTC                    |                               |
| EcrpoA-F    | GAAGGAGATATACATATGCAGGGTTCTGTG<br>ACAGAGTTTC                      | pEcRc<br>pEcRc $\Delta\omega$ |
| EcrpoA-R    | TTCCTCAGTCGCTGACAAGTCCACGGATCG<br>GGGATCCGGTACTCGTCAGCGATGCTTG    |                               |



|                      |                                                                     |                                  |
|----------------------|---------------------------------------------------------------------|----------------------------------|
| EcrpoZ-F             | GTCAGCGACTGAGGAAGACTTAAGAAGGA<br>GATTAATGTATGGCACGCGTAACTGTTCAG     |                                  |
| EcrpoZ-R             | GTGCTCGAGTGC GGCCGCTTAACGACGACC<br>TTCAGCAATAG                      |                                  |
| EcrpoBC-F            | GTCAGCGACTGAGGAAACAGACCATGGAT<br>CCCCGATCCGTCGACTTGTTCAGCGAGCTG     |                                  |
| EcrpoBC-His-R        | CTTAAGTCTGCAGTCATTTAATGGTGATGG<br>TGATGGTGACCTCGAGCTCGTTATCAGA      |                                  |
| EcAZ-F               | ATGACTGCAGACTTAAGAAGGAGATTAAT<br>G                                  |                                  |
| MsrpoA-F             | TAAGAAGGAGATATACATATGCTGATCTCTC<br>AGCGTCCCACC                      | pET21a- <i>MsrpoAZ</i><br>B      |
| MsrpoA-R             | ATCTCCTTCTTAAGTCTGCTTAAAGCTGCTC<br>GGTCTCGGCGTAG                    |                                  |
| MsrpoZ-F             | CAGACTTAAGAAGGAGATATAGATATGAGC<br>ACCCCGCACGCCGATGCGCAG             |                                  |
| MsrpoZ-R             | CTTCCTTTCGGGCTTTGTTATTCGCCTTCGG<br>TGTGCTCGAG                       |                                  |
| MsrpoB-F             | TAAGAAGGAGATATACATATGCTGGAAGGAT<br>GCATCTTGGCAG                     |                                  |
| MsrpoB-R             | CTTCCTTTCGGGCTTTGTTACGCGAGATCCT<br>CGACGGACGCGGAT                   |                                  |
| MsrpoA-R2            | CTTCCTTTCGGGCTTTGTTAAAGCTGCTCGG<br>TCTCGGCGTAG                      | pET21a- <i>MsrpoAB</i>           |
| <i>MsrpoZ-Flag-F</i> | CGAAGGCGAAGACTACAAAGACGATGACG<br>ACAAGTAACAAAGCCCGAAAGGAAGCTGA<br>G | pET21a- <i>MsrpoAB</i><br>Z-Flag |
| <i>MsrpoZ-Flag-R</i> | GGCTTTGTTACTTGTTCGTCATCGTCTTTGTA<br>GTCTTCGCCTTCGGTGTGCTCGAGCAGG    |                                  |
| MsrpoC-F             | CTTAAGAAGGAGATATACCATGCTAGACGT<br>CAACTTCTTCGATGAAC                 | pET28a- <i>MsrpoC</i>            |
| MsrpoC-R             | CTTCCTTTCGGGCTTTGTTAGTGGTGGTGGT<br>GGTGGTGGCGGTAATCCGAGTAGCCGTA     |                                  |
| ScorpoA-F            | TAAGAAGGAGATATACATATGCTGATCGCTC<br>AGCGTCCCTCG                      | pET21a- <i>ScoAZB</i>            |
| ScorpoA-R            | ATCTCCTTCTTAAGTCTGCTTAGTACTGCTC<br>GGTCTCCACGAAACC                  |                                  |
| ScorpoZ-F            | CAGACTTAAGAAGGAGATATAGATATGTCCT<br>CTTCCATCTCCGCGCCCGAG             |                                  |
| ScorpoZ-R            | CTTCCTTTCGGGCTTTGTTACTGCGCCGGGC<br>CCTCGATGGCCTCGGA                 |                                  |
| ScorpoB-F            | TAAGAAGGAGATATACATATGGCCGCCTCGC<br>GCAATGCCTCGACC                   |                                  |
| ScorpoB-R            | CTTCCTTTCGGGCTTTGTTAGACCTCTTCGA<br>CGCTGCTCGGCTCG                   |                                  |
| Sco-B-RC-R           | CAGCGGTGGCAGCAGCCAAC                                                |                                  |
| ScorpoA-R1           | CTTCCTTTCGGGCTTTGTTAGTACTGCTCGG<br>TCTCCACGAAACC                    | pET21a- <i>ScoAB</i>             |
| ScorpoC-F            | TAAGAAGGAGATATACATATGCTCGACGTCA<br>ACTTCTTCGACGAGCT                 | pKT-T7- <i>ScoC</i>              |

|                            |                                                                   |                                                          |
|----------------------------|-------------------------------------------------------------------|----------------------------------------------------------|
| ScorpoC-R                  | CTTCCTTTCGGGCTTTGTTAGTGGTGGTGGT<br>GGTGGTGCTGGTTGTACGGACCGTAGTC   |                                                          |
| <i>EcrpoA</i> -F           | AAGAAGGAGATATACATATGCAGGGTTCTGT<br>GACAGAGTTTC                    | pET21a- <i>EcrpoA</i>                                    |
| <i>EcrpoA</i> -R           | CTTCCTTTCGGGCTTTGTTAGTGGTGGTGGT<br>GGTGGTGCTCGTCAGCGATGCTTGCCGG   |                                                          |
| <i>EcrpoB</i> -21a-F       | TAAGAAGGAGATATACATATGGTTTACTCC<br>TATACCGAGAAAAAAC                | pET21a- <i>EcrpoB</i>                                    |
| <i>EcrpoB</i> -21a-R       | CTTCCTTTCGGGCTTTGTTACTCGTCTTCCA<br>GTTTCGATGTTG                   |                                                          |
| <i>EcrpoC</i> -21a-F       | TAAGAAGGAGATATACATATGAAAGATTT<br>ATTAAAGTTTCTGAAAG                | pET21a- <i>EcrpoC</i>                                    |
| <i>EcrpoC</i> -21a-R       | CTTCCTTTCGGGCTTTGTTACTCGAGCTCGT<br>TATCAGAACCGCCCAG               |                                                          |
| <i>EcrpoZ</i> -F           | AAGAAGGAGATATACATATGGCACGCGTAA<br>CTGTTCAGGAC                     | pET21a- <i>EcrpoZ</i><br>pET28a- <i>EcrpoZ</i> -Fl<br>ag |
| <i>EcrpoZ</i> -R           | CTTCCTTTCGGGCTTTGTTAGTGGTGGTGGT<br>GGTGGTGACGACGACCTTCAGCAATAGC   |                                                          |
| <i>EcrpoZ</i> flag-R       | CTTTCGGGCTTTGTTACTTGTTCGTCATCGTC<br>TTTGTAGTCACGACGACCTTCAGCAATA  |                                                          |
| <i>ThrpoZ</i> -F           | AAGAAGGAGATATACATATGGCGGAACCGG<br>GCATTGACAAGC                    | pET28a- <i>ThrpoZ</i> -Fl<br>ag                          |
| <i>ThrpoZ</i> -R           | CTTTCGGGCTTTGTTACTTGTTCGTCATCGTC<br>TTTGTAGTCCTCCTCCCGCTCCACCGGG  |                                                          |
| RpoZM1-F                   | CCGGCAGATCGGTAGCGGTGGTAGCCAGCT<br>TGGCGAGGGCAGCTCCTCGAATATGTCGGTC | pET28a- <i>MtbrpoZ</i> -<br>M1-Flag                      |
| RpoZM1-R                   | CGCCAAGCTGGCTACCACCGCTACCGATCT<br>GCCGGGCACGCTTTGCCGCATAGATCACG   |                                                          |
| RpoZM2-F                   | CTACTACAACGGTAGCGGTGGTAGCATCCT<br>CGAATATGTCGGTCCGCTGGTTGAGCCGG   | pET28a- <i>MtbrpoZ</i> -<br>M2-Flag                      |
| RpoZM2-R                   | ATTCGAGGATGCTACCACCGCTACCGTTGTA<br>GTAGTCGTTGATCTGCCGGGCACGCTTT   |                                                          |
| RpoZM3-F                   | TGGCGAGGGCGGTAGCGGTGGTAGCGGTCC<br>GCTGGTTGAGCCGGGGTTGCAAGAGAAGC   | pET28a- <i>MtbrpoZ</i> -<br>M3-Flag                      |
| RpoZM3-R                   | CCAGCGGACCGCTACCACCGCTACCGCCCT<br>CGCCAAGCTGGTTGTAGTAGTCGTTGATC   |                                                          |
| RpoZM4-F                   | CGAATATGTCGGTAGCGGTGGTAGCCCGGG<br>GTTGCAAGAGAAGCCGTTGTCCATCGCGT   | pET28a- <i>MtbrpoZ</i> -<br>M4-Flag                      |
| RpoZM4-R                   | GCAACCCCGGGCTACCACCGCTACCGACAT<br>ATTCGAGGATGCCCTCGCCAAGCTGGTTG   |                                                          |
| RpoZM5-F                   | GCTGGTTGAGGGTAGCGGTGGTAGCAAGCC<br>GTTGTCCATCGCGTTGCGCGAGATCCACG   | pET28a- <i>MtbrpoZ</i> -<br>M5-Flag                      |
| RpoZM5-R                   | ACAACGGCTTGCTACCACCGCTACCCTCAA<br>CCAGCGGACCGACATATTCGAGGATGCC    |                                                          |
| pTargetF- <i>EcrpoZ</i> -F | GTATAATACTAGTGCCTGCGCGAAATCGAA<br>GAGTTTTAGAGCTAGAAATAGCAAGTT     | pTarget- <i>EcrpoZ</i>                                   |
| pTargetF- <i>EcrpoZ</i> -R | GCTCTAAACTCTTCGATTCGCGCAGCGC<br>ACTAGTATTATACCTAGGACTGAGCTAG      |                                                          |
| <i>EcrpoZ</i> -Cm-F        | CATGCCAGTCATTTCTTCACCTGTGGAGCT<br>TTTTAAGTAGATTGCAGCATTACACGTC    | For constructing<br>BL21(DE3) $\Delta$ <i>rpoZ</i>       |

|             |                                                                 |                                                           |
|-------------|-----------------------------------------------------------------|-----------------------------------------------------------|
| EcrpoZ-Cm-R | TTCAGGCTTTCAAACAGATACAAGGGCGAC<br>CCGCTTTGTGATGTAACGCACTGAGAAGC | mutant                                                    |
| Rv1494p-F   | CGCGGCGATTGACCTGCTGCACA                                         | Amplify promoters<br>for <i>in vitro</i><br>transcription |
| Rv1494p-R   | GGCGCTGGCGAGTTTGCTGGTCGA                                        |                                                           |
| Rv0005p-F   | CTAGTCACGTCACGGCCGGGTAAAAACGA<br>GGCCAGA                        |                                                           |
| Rv0005p-R   | CCGAATACTCTCCTCAGGGGTTGCGTGCAT<br>GC                            |                                                           |
| rrnP3-F     | GCCGGCTATGGATGACCGAACCTG                                        |                                                           |
| rrnp3-R     | CCCGGCGTTCCGCCCCTTCGG                                           |                                                           |

171

172

173

174 **Supplemental references:**

175

- 176 1. **Hu Y, Morichaud Z, Perumal AS, Roquet-Baneres F, Brodolin K.** 2014.  
177 Mycobacterium RbpA cooperates with the stress-response sigmaB subunit of RNA  
178 polymerase in promoter DNA unwinding. *Nucleic Acids Res* **42**:10399-10408.
- 179 2. **Jiang Y, Chen B, Duan C, Sun B, Yang J, Yang S.** 2015. Multigene editing in the  
180 *Escherichia coli* genome via the CRISPR-Cas9 system. *Appl Environ Microbiol*  
181 **81**:2506-2514.
- 182 3. **Kapust RB, Tozser J, Fox JD, Anderson DE, Cherry S, Copeland TD, Waugh DS.**  
183 2001. Tobacco etch virus protease: mechanism of autolysis and rational design of stable  
184 mutants with wild-type catalytic proficiency. *Protein Eng* **14**:993-1000.

185
